# Supplementary material for: Epidemiological Profile of Hospitalized Patients with Cystic Fibrosis in Brazil Due to Severe Acute Respiratory Infection during the COVID-19 Pandemic and a Systematic Review of Worldwide COVID-19 in Those with Cystic Fibrosis
Source: MDPI journal article supplement (doi:10.3390/healthcare11131936), 2023-07-04
Supplement: s1 [file s1]

**Title:** Epidemiological Profile of Hospitalized Patients with Cystic Fibrosis in Brazil due to Severe Acute Respiratory Infection During the COVID-19 Pandemic and a Systematic Review of Worldwide COVID-19 in Those with Cystic Fibrosis

### **Systematic Review Search**

“Search: (((COVID-19 OR COVID OR Coronavirus Disease OR Coronavirus Disease 2019 OR SARS-CoV OR SARS-CoV-2 OR SARS OR severe acute respiratory syndrome) AND (Cystic Fibrosis OR CFTR OR Cystic Fibrosis Transmembrane Regulator))) AND ((“2019/11/17”[Date - Publication] : “2022/03/25”[Date - Publication])) (“covid 19”[All Fields] OR “covid 19”[MeSH Terms] OR “covid 19 vaccines”[All Fields] OR “covid 19 vaccines”[MeSH Terms] OR “covid 19 serotherapy”[All Fields] OR “covid 19 serotherapy”[Supplementary Concept] OR “covid 19 nucleic acid testing”[All Fields] OR “covid 19 nucleic acid testing”[MeSH Terms] OR “covid 19 serological testing”[All Fields] OR “covid 19 serological testing”[MeSH Terms] OR “covid 19 testing”[All Fields] OR “covid 19 testing”[MeSH Terms] OR “sars cov 2”[All Fields] OR “sars cov 2”[MeSH Terms] OR “severe acute respiratory syndrome coronavirus 2”[All Fields] OR “ncov”[All Fields] OR “2019 ncov”[All Fields] OR (“coronavirus”[MeSH Terms] OR “coronavirus”[All Fields] OR “cov”[All Fields]) AND 2019/11/01:3000/12/31[Date - Publication]) OR (“sars cov 2”[MeSH Terms] OR “sars cov 2”[All Fields] OR “covid”[All Fields] OR “covid 19”[MeSH Terms] OR “covid 19”[All Fields]) OR (“coronavirus”[MeSH Terms] OR “coronavirus”[All Fields] OR “coronaviruses”[All Fields]) AND (“disease”[MeSH Terms] OR “disease”[All Fields] OR “diseases”[All Fields] OR “disease s”[All Fields] OR “diseased”[All Fields])) OR (“covid 19”[MeSH Terms] OR “covid 19”[All Fields] OR “coronavirus disease 2019”[All Fields]) OR (“sars virus”[MeSH Terms] OR (“SARS”[All Fields] AND “virus”[All Fields]) OR “sars virus”[All Fields] OR (“SARS”[All Fields] AND “cov”[All Fields]) OR “sars cov”[All Fields]) OR (“sars cov 2”[MeSH Terms] OR “sars cov 2”[All Fields] OR “sars cov 2”[All Fields]) OR “SARS”[All Fields] OR (“severe acute respiratory syndrome”[MeSH Terms] OR (“severe”[All Fields] AND “acute”[All Fields] AND “respiratory”[All Fields] AND “syndrome”[All Fields]) OR “severe acute respiratory syndrome”[All Fields])) AND (“cystic fibrosis”[MeSH Terms] OR (“cystic”[All Fields] AND “fibrosis”[All Fields]) OR “cystic fibrosis”[All Fields] OR “CFTR”[All Fields] OR (“cystic fibrosis”[MeSH Terms] OR (“cystic”[All Fields] AND “fibrosis”[All Fields]) OR “cystic fibrosis”[All Fields]) AND (“transmembranal”[All Fields] OR “transmembrane”[All Fields] OR “transmembraneous”[All Fields] OR “transmembranes”[All Fields] OR “transmembranous”[All Fields]) AND (“legislation and jurisprudence”[MeSH Subheading] OR (“legislation”[All Fields] AND “jurisprudence”[All Fields]) OR “legislation and jurisprudence”[All Fields] OR “regulations”[All Fields] OR “social control, formal”[MeSH Terms] OR (“social”[All Fields] AND “control”[All Fields] AND “formal”[All Fields]) OR “formal social control”[All Fields] OR “regulate”[All Fields] OR “regulates”[All Fields] OR “regulating”[All Fields] OR “regulation s”[All Fields] OR “regulative”[All Fields] OR “regulator”[All Fields] OR “regulator s”[All Fields] OR “regulators”[All Fields] OR “regulated”[All Fields] OR “regulation”[All Fields])) AND 2019/11/17:2022/03/25[Date - Publication] Translations COVID-19: (“COVID-19” OR “COVID-19”[MeSH Terms] OR “COVID-19 Vaccines” OR “COVID-19 Vaccines”[MeSH Terms] OR “COVID-19 serotherapy” OR “COVID-19 serotherapy”[Supplementary Concept] OR “COVID-19 Nucleic Acid Testing” OR “covid-19 nucleic acid testing”[MeSH Terms] OR “COVID-19 Serological Testing” OR “covid-19 serological testing”[MeSH Terms] OR “COVID-19 Testing” OR “covid-19 testing”[MeSH Terms] OR “SARS-CoV-2” OR “sars-cov-2”[MeSH Terms] OR “Severe Acute Respiratory Syndrome Coronavirus 2” OR “NCOV” OR “2019 NCOV” OR (“coronavirus”[MeSH Terms] OR “coronavirus”[All Fields] OR “COV”)) AND 2019/11/01[PDAT] : 3000/12/31[PDAT])) COVID: “sars-cov-2”[MeSH Terms] OR “sars-cov-2”[All Fields] OR “covid”[All Fields] OR “covid-19”[MeSH Terms] OR “covid-19”[All Fields] Coronavirus: “coronavirus”[MeSH Terms] OR “coronavirus”[All Fields] OR “coronaviruses”[All Fields] Disease: “disease”[MeSH Terms] OR “disease”[All Fields] OR “diseases”[All Fields] OR “disease’s”[All Fields] OR “diseased”[All Fields] Coronavirus Disease 2019: “covid-19”[MeSH Terms] OR “covid-19”[All Fields] OR “coronavirus disease 2019”[All Fields] SARS-CoV: “sars virus”[MeSH Terms] OR (“sars”[All Fields] AND “virus”[All Fields]) OR “sars virus”[All Fields] OR (“sars”[All Fields] AND “cov”[All Fields]) OR “sars cov”[All Fields] SARS-CoV-2: “sars-cov-2”[MeSH Terms] OR “sars-cov-2”[All Fields] OR “sars cov 2”[All Fields] severe acute respiratory syndrome: “severe acute respiratory syndrome”[MeSH Terms] OR (“severe”[All Fields] AND “acute”[All Fields] AND “respiratory”[All Fields] AND “syndrome”[All Fields]) OR “severe acute respiratory syndrome”[All Fields] Cystic Fibrosis: “cystic fibrosis”[MeSH Terms] OR (“cystic”[All Fields] AND “fibrosis”[All Fields]) OR “cystic fibrosis”[All Fields] Cystic Fibrosis: “cystic fibrosis”[MeSH Terms] OR (“cystic”[All Fields] AND “fibrosis”[All Fields]) OR “cystic fibrosis”[All Fields] Transmembrane: “transmembranal”[All Fields] OR “transmembrane”[All Fields] OR “transmembraneous”[All Fields] OR “transmembranes”[All Fields] OR “transmembranous”[All Fields] Regulator: “legislation and jurisprudence”[Subheading] OR (“legislation”[All Fields] AND “jurisprudence”[All Fields]) OR “legislation and jurisprudence”[All Fields] OR “regulations”[All Fields] OR “social control, formal”[MeSH Terms] OR (“social”[All Fields] AND “control”[All Fields] AND “formal”[All Fields]) OR “formal social control”[All Fields] OR “regulate”[All Fields] OR “regulates”[All Fields] OR “regulating”[All Fields] OR “regulation’s”[All Fields] OR “regulative”[All Fields] OR “regulator”[All Fields] OR “regulator’s”[All Fields] OR “regulators”[All Fields] OR “regulated”[All Fields] OR “regulation”[All Fields]”.

**Supplementary Table S1.** Distribution of the hospitalized patients with cystic fibrosis due to severe acute respiratory infection in Brazil during the coronavirus disease, COVID-19 pandemic.

| States and the Federal District | Place of Notification (N, %) | Place of Residence (N, %) |
|---------------------------------|------------------------------|---------------------------|
| Acre                            | 2 (0.5%)                     | 2 (0.5%)                  |
| Alagoas                         | 5 (1.2%)                     | 5 (1.2%)                  |
| Amazonas                        | 6 (1.4%)                     | 6 (1.4%)                  |
| Amapá                           | 1 (0.2%)                     | 1 (0.2%)                  |
| Bahia                           | 9 (2.1%)                     | 9 (2.1%)                  |
| Ceará                           | 16 (3.8%)                    | 16 (3.8%)                 |
| Espírito Santo                  | 4 (0.9%)                     | 4 (0.9%)                  |
| Federal District                | 15 (3.5%)                    | 9 (2.1%)                  |
| Goiás                           | 12 (2.8%)                    | 17 (4.0%)                 |
| Maranhão                        | 2 (0.5%)                     | 2 (0.5%)                  |
| Mato Grosso do Sul              | 8 (1.9%)                     | 8 (1.9%)                  |
| Mato Grosso                     | 5 (1.2%)                     | 5 (1.2%)                  |
| Minas Gerais                    | 70 (16.4%)                   | 70 (16.4%)                |
| Pará                            | 1 (0.2%)                     | 1 (0.2%)                  |
| Paraíba                         | 7 (1.6%)                     | 7 (1.6%)                  |
| Paraná                          | 56 (13.1%)                   | 55 (12.9%)                |
| Pernambuco                      | 10 (2.3%)                    | 10 (2.3%)                 |
| Piauí                           | 0 (0.0%)                     | 0 (0.0%)                  |
| Rio de Janeiro                  | 15 (3.5%)                    | 16 (3.8%)                 |
| Rio Grande do Norte             | 7 (1.6%)                     | 7 (1.6%)                  |
| Rio Grande do Sul               | 29 (6.8%)                    | 29 (6.8%)                 |
| Roraima                         | 0 (0.0%)                     | 0 (0.0%)                  |
| Rondônia                        | 1 (0.2%)                     | 1 (0.2%)                  |
| Santa Catarina                  | 28 (6.6%)                    | 29 (6.8%)                 |
| São Paulo                       | 108 (25.4%)                  | 108 (25.4%)               |
| Sergipe                         | 6 (1.4%)                     | 6 (1.4%)                  |
| Tocantins                       | 3 (0.7%)                     | 3 (0.7%)                  |
| Total                           | 426                          | 426                       |

We presented the data using the number of individuals (N) and the percentage (%).

**Supplementary Table S2.** Description of the clinical symptoms and comorbidities of the hospitalized patients with cystic fibrosis according to the severe acute respiratory infection (SARI) groups in Brazil during the coronavirus disease, COVID-19 pandemic.

| Markers                               | Data | SARI due to Another Viral Infection | SARI due to an Unknown Etiological Agent | SARI due to SARS-CoV-2 Infection | Total       | <i>p</i>                  |
|---------------------------------------|------|-------------------------------------|------------------------------------------|----------------------------------|-------------|---------------------------|
| <b>Clinical symptoms</b>              |      |                                     |                                          |                                  |             |                           |
| Fever                                 | Yes  | 19 (82.6%)                          | 168 (58.7%)                              | 72 (61.5%)                       | 259 (60.8%) | 0.070 <sup>b</sup>        |
|                                       | No   | 4 (17.4%)                           | 118 (41.3%)                              | 45 (38.5%)                       | 167 (39.2%) |                           |
| Cough                                 | Yes  | 23 (100.0%)                         | 236 (82.5%)                              | 98 (83.8%)                       | 357 (83.8%) | 0.068 <sup>b</sup>        |
|                                       | No   | 0 (0.0%)                            | 50 (17.5%)                               | 19 (16.2%)                       | 69 (16.2%)  |                           |
| Sore throat                           | Yes  | 0 (0.0%)                            | 19 (6.6%)                                | 14 (12.0%)                       | 33 (7.7%)   | 0.083 <sup>b</sup>        |
|                                       | No   | 23 (100.0%)                         | 267 (93.4%)                              | 103 (88.0%)                      | 393 (92.3%) |                           |
| Dyspnea                               | Yes  | 20 (87.0%)                          | 228 (79.7%)                              | 107 (91.5%)                      | 355 (83.3%) | <b>0.010 <sup>b</sup></b> |
|                                       | No   | 3 (13.0%)                           | 58 (20.3%)                               | 10 (8.5%)                        | 71 (16.7%)  |                           |
| Respiratory discomfort                | Yes  | 19 (82.6%)                          | 218 (76.2%)                              | 97 (82.9%)                       | 334 (78.4%) | 0.326 <sup>b</sup>        |
|                                       | No   | 4 (17.4%)                           | 68 (23.8%)                               | 20 (17.1%)                       | 92 (21.6%)  |                           |
| Peripheral arterial oxygen saturation | <95% | 14 (60.9%)                          | 202 (70.6%)                              | 95 (81.2%)                       | 311 (73.0%) | <b>0.035 <sup>a</sup></b> |
|                                       | ≥95% | 9 (39.1%)                           | 84 (29.4%)                               | 22 (18.8%)                       | 115 (27.0%) |                           |
| Diarrhea                              | Yes  | 1 (4.3%)                            | 24 (8.4%)                                | 7 (6.0%)                         | 32 (7.5%)   | 0.685 <sup>b</sup>        |
|                                       | No   | 22 (95.7%)                          | 262 (91.6%)                              | 110 (94.0%)                      | 394 (92.5%) |                           |
| Vomit                                 | Yes  | 3 (13.0%)                           | 34 (11.9%)                               | 6 (5.1%)                         | 43 (10.1%)  | 0.071 <sup>b</sup>        |
|                                       | No   | 20 (87.0%)                          | 252 (88.1%)                              | 111 (94.9%)                      | 383 (89.9%) |                           |
| Coryza                                | Yes  | 2 (8.7%)                            | 10 (3.5%)                                | 2 (1.7%)                         | 14 (3.3%)   | 0.209 <sup>b</sup>        |
|                                       | No   | 21 (91.3%)                          | 276 (96.5%)                              | 115 (98.3%)                      | 412 (96.7%) |                           |
| Headache                              | Yes  | 0 (0.0%)                            | 12 (4.2%)                                | 9 (7.7%)                         | 21 (4.9%)   | 0.234 <sup>b</sup>        |
|                                       | No   | 23 (100.0%)                         | 274 (95.8%)                              | 108 (92.3%)                      | 405 (95.1%) |                           |
| Myalgia                               | Yes  | 0 (0.0%)                            | 7 (2.4%)                                 | 6 (5.1%)                         | 13 (3.1%)   | 0.324 <sup>b</sup>        |

|                           |     |             |              |              |             |                      |
|---------------------------|-----|-------------|--------------|--------------|-------------|----------------------|
|                           | No  | 23 (100.0%) | 279 (97.6%)  | 111 (94.9%)  | 413 (96.9%) |                      |
| Other clinical symptoms   | Yes | 3 (13.0%)   | 37 (12.9%)   | 18 (15.4%)   | 58 (13.6%)  | 0.803 <sup>b</sup>   |
|                           | No  | 20 (87.0%)  | 249 (87.1%)  | 99 (84.6%)   | 368 (86.4%) |                      |
| <b>Comorbidities</b>      |     |             |              |              |             |                      |
| Cardiopathy               | Yes | 0 (0.0%)    | 22 (7.7%)    | 32 (27.4%)   | 54 (12.7%)  | < 0.001 <sup>b</sup> |
|                           | No  | 23 (100.0%) | 264 (92.3%)  | 85 (72.6%)   | 372 (87.3%) |                      |
| Hematological disease     | Yes | 0 (0.0%)    | 0 (0.0%)     | 2 (1.7%)     | 2 (0.5%)    | 0.180 <sup>b</sup>   |
|                           | No  | 23 (100.0%) | 286 (100.0%) | 115 (98.3%)  | 424 (99.5%) |                      |
| Down's syndrome           | Yes | 0 (0.0%)    | 3 (1.0%)     | 0 (0.0%)     | 3 (0.7%)    | 0.627 <sup>b</sup>   |
|                           | No  | 23 (100.0%) | 283 (99.0%)  | 117 (100.0%) | 423 (99.3%) |                      |
| Liver disease             | Yes | 1 (4.3%)    | 7 (2.4%)     | 1 (0.9%)     | 9 (2.1%)    | 0.299 <sup>b</sup>   |
|                           | No  | 22 (95.7%)  | 279 (97.6%)  | 116 (99.1%)  | 417 (97.9%) |                      |
| Asthma                    | Yes | 3 (13.0%)   | 11 (3.8%)    | 8 (6.8%)     | 22 (5.2%)   | 0.082 <sup>b</sup>   |
|                           | No  | 20 (87.0%)  | 275 (96.2%)  | 109 (93.2%)  | 404 (94.8%) |                      |
| Diabetes mellitus         | Yes | 0 (0.0%)    | 29 (10.1%)   | 17 (14.5%)   | 46 (10.8%)  | 0.093 <sup>b</sup>   |
|                           | No  | 23 (100.0%) | 257 (89.9%)  | 100 (85.5%)  | 380 (89.2%) |                      |
| Neurological disease      | Yes | 0 (0.0%)    | 10 (3.5%)    | 4 (3.4%)     | 14 (3.3%)   | 1.000 <sup>b</sup>   |
|                           | No  | 23 (100.0%) | 276 (96.5%)  | 113 (96.6%)  | 412 (96.7%) |                      |
| Immunosuppressive disease | Yes | 0 (0.0%)    | 9 (3.1%)     | 8 (6.8%)     | 17 (4.0%)   | 0.175 <sup>b</sup>   |
|                           | No  | 23 (100.0%) | 277 (96.9%)  | 109 (93.2%)  | 409 (96.0%) |                      |
| Kidney disease            | Yes | 0 (0.0%)    | 7 (2.4%)     | 3 (2.6%)     | 10 (2.3%)   | 1.000 <sup>b</sup>   |
|                           | No  | 23 (100.0%) | 279 (97.6%)  | 114 (97.4%)  | 416 (97.7%) |                      |
| Obesity                   | Yes | 0 (0.0%)    | 3 (1.0%)     | 4 (3.4%)     | 7 (1.6%)    | 0.225 <sup>b</sup>   |
|                           | No  | 23 (100.0%) | 283 (99.0%)  | 113 (96.6%)  | 419 (98.4%) |                      |

We presented the data using the number of individuals (N) and the percentage (%); SARS-CoV-2, severe acute respiratory syndrome coronavirus 2; <sup>a</sup>, we performed the statistical analysis using the chi-square test; <sup>b</sup>, we performed the statistical analysis using the Fisher's exact test. We adopted an alpha error of 0.05. We demonstrated the significant *p* using the bold type.

**Supplementary Table S3.** Association between the need for intensive care unit, the need for mechanical ventilation, and the death of the hospitalized patients with cystic fibrosis according to the severe acute respiratory infection (SARI) groups in Brazil during the coronavirus disease, COVID-19 pandemic.

| Markers                             | Data                          | SARI due to An-<br>other Viral Infec-<br>tion | SARI due to an Un-<br>known Etiological<br>Agent | SARS-CoV-2 In-<br>fection | Total       | <i>p</i>             |
|-------------------------------------|-------------------------------|-----------------------------------------------|--------------------------------------------------|---------------------------|-------------|----------------------|
| Intensive care unit                 | Yes                           | 1 (4.3%)                                      | 82 (28.7%)                                       | 52 (44.4%)                | 135 (31.7%) | < 0.001 <sup>a</sup> |
|                                     | No                            | 22 (95.7%)                                    | 204 (71.3%)                                      | 65 (55.6%)                | 291 (68.3%) |                      |
| Mechanical ventila-<br>tory support | Invasive                      | 0 (0.0%)                                      | 38 (13.3%)                                       | 29 (24.8%)                | 67 (15.7%)  | 0.007 <sup>a</sup>   |
|                                     | Non-invasive                  | 15 (65.2%)                                    | 166 (58.0%)                                      | 63 (53.8%)                | 244 (57.3%) |                      |
|                                     | None                          | 8 (34.8%)                                     | 82 (28.7%)                                       | 25 (21.4%)                | 115 (27.0%) |                      |
| Outcomes                            | Clinical recovery             | 23 (100.0%)                                   | 231 (80.8%)                                      | 65 (55.6%)                | 319 (74.9%) | < 0.001 <sup>a</sup> |
|                                     | Death due to SARI             | 0 (0.0%)                                      | 43 (15.0%)                                       | 51 (43.6%)                | 94 (22.1%)  |                      |
|                                     | Death was not related to SARI | 0 (0.0%)                                      | 12 (4.2%)                                        | 1 (0.9%)                  | 13 (3.1%)   |                      |

We presented the data using the number of individuals (N) and the percentage (%).SARS-CoV-2, severe acute respiratory syndrome coronavirus 2; <sup>a</sup>, we performed the statistical analysis using the Fisher's exact test. We adopted an alpha error of 0.05. We demonstrated the significant *p* using the bold type.

**Supplementary Table S4.** Association between clinical symptoms and comorbidities of the hospitalized patients with cystic fibrosis and SARS-CoV-2 infection in Brazil according to the outcome during the coronavirus disease, COVID-19 pandemic.

| Markers                  | Data | Death due to SARI | Clinical Recovery | Total       | <i>p</i>           |
|--------------------------|------|-------------------|-------------------|-------------|--------------------|
| <b>Clinical Symptoms</b> |      |                   |                   |             |                    |
| Fever                    | Yes  | 25 (49.0%)        | 47 (72.3%)        | 72 (62.1%)  | 0.013 <sup>a</sup> |
|                          | No   | 26 (51.0%)        | 18 (27.7%)        | 44 (37.9%)  |                    |
| Cough                    | Yes  | 42 (82.4%)        | 55 (84.6%)        | 97 (83.6%)  | 0.803 <sup>a</sup> |
|                          | No   | 9 (17.6%)         | 10 (15.4%)        | 19 (16.4%)  |                    |
| Sore throat              | Yes  | 6 (11.8%)         | 8 (12.3%)         | 14 (12.1%)  | 1.000 <sup>a</sup> |
|                          | No   | 45 (88.2%)        | 57 (87.7%)        | 102 (87.9%) |                    |

|                                       |      |            |             |             |                           |
|---------------------------------------|------|------------|-------------|-------------|---------------------------|
| Dyspnea                               | Yes  | 49 (96.1%) | 57 (87.7%)  | 106 (91.4%) | 0.182 <sup>b</sup>        |
|                                       | No   | 2 (3.9%)   | 8 (12.3%)   | 10 (8.6%)   |                           |
| Respiratory discomfort                | Yes  | 44 (86.3%) | 52 (80.0%)  | 96 (82.8%)  | 0.461 <sup>a</sup>        |
|                                       | No   | 7 (13.7%)  | 13 (20.0%)  | 20 (17.2%)  |                           |
| Peripheral arterial oxygen saturation | <95% | 46 (90.2%) | 48 (73.8%)  | 94 (81.0%)  | <b>0.032 <sup>a</sup></b> |
|                                       | ≥95% | 5 (9.8%)   | 17 (26.2%)  | 22 (19.0%)  |                           |
| Diarrhea                              | Yes  | 5 (9.8%)   | 2 (3.1%)    | 7 (6.0%)    | 0.238 <sup>b</sup>        |
|                                       | No   | 46 (90.2%) | 63 (96.9%)  | 109 (94.0%) |                           |
| Vomit                                 | Yes  | 2 (3.9%)   | 4 (6.2%)    | 6 (5.2%)    | 0.693 <sup>b</sup>        |
|                                       | No   | 49 (96.1%) | 61 (93.8%)  | 110 (94.8%) |                           |
| Coryza                                | Yes  | 1 (2.0%)   | 1 (1.5%)    | 2 (1.7%)    | 1.000 <sup>b</sup>        |
|                                       | No   | 50 (98.0%) | 64 (98.5%)  | 114 (98.3%) |                           |
| Headache                              | Yes  | 4 (7.8%)   | 5 (7.7%)    | 9 (7.8%)    | 1.000 <sup>b</sup>        |
|                                       | No   | 47 (92.2%) | 60 (92.3%)  | 107 (92.2%) |                           |
| Myalgia                               | Yes  | 4 (7.8%)   | 2 (3.1%)    | 6 (5.2%)    | 0.403 <sup>b</sup>        |
|                                       | No   | 47 (92.2%) | 63 (96.9%)  | 110 (94.8%) |                           |
| Other symptoms                        | Yes  | 5 (9.8%)   | 13 (20.0%)  | 18 (15.5%)  | 0.196 <sup>a</sup>        |
|                                       | No   | 46 (90.2%) | 52 (80.0%)  | 98 (84.5%)  |                           |
| <b>Comorbidities</b>                  |      |            |             |             |                           |
| Cardiopathy                           | Yes  | 15 (29.4%) | 17 (26.2%)  | 32 (27.6%)  | 0.835 <sup>a</sup>        |
|                                       | No   | 36 (70.6%) | 48 (73.8%)  | 84 (72.4%)  |                           |
| Hematological disease                 | Yes  | 1 (2.0%)   | 1 (1.5%)    | 2 (1.7%)    | 1.000 <sup>b</sup>        |
|                                       | No   | 50 (98.0%) | 64 (98.5%)  | 114 (98.3%) |                           |
| Liver disease                         | Yes  | 1 (2.0%)   | 0 (0.0%)    | 1 (0.9%)    | 0.440 <sup>b</sup>        |
|                                       | No   | 50 (98.0%) | 65 (100.0%) | 115 (99.1%) |                           |
| Asthma                                | Yes  | 5 (9.8%)   | 3 (4.6%)    | 8 (6.9%)    | 0.297 <sup>b</sup>        |
|                                       | No   | 46 (90.2%) | 62 (95.4%)  | 108 (93.1%) |                           |
| Diabetes mellitus                     | Yes  | 6 (11.8%)  | 11 (16.9%)  | 17 (14.7%)  | 0.598 <sup>a</sup>        |
|                                       | No   | 45 (88.2%) | 54 (83.1%)  | 99 (85.3%)  |                           |
| Neurological disease                  | Yes  | 1 (2.0%)   | 3 (4.6%)    | 4 (3.4%)    | 0.630 <sup>b</sup>        |
|                                       | No   | 50 (98.0%) | 62 (95.4%)  | 112 (96.6%) |                           |
| Immunosuppressive disease             | Yes  | 4 (7.8%)   | 4 (6.2%)    | 8 (6.9%)    | 0.729 <sup>b</sup>        |
|                                       | No   | 47 (92.2%) | 61 (93.8%)  | 108 (93.1%) |                           |
| Kidney disease                        | Yes  | 1 (2.0%)   | 2 (3.1%)    | 3 (2.6%)    | 1.000 <sup>b</sup>        |
|                                       | No   | 50 (98.0%) | 63 (96.9%)  | 113 (97.4%) |                           |
| Obesity                               | Yes  | 3 (5.9%)   | 1 (1.5%)    | 4 (3.4%)    | 0.319 <sup>b</sup>        |
|                                       | No   | 48 (94.1%) | 64 (98.5%)  | 112 (96.6%) |                           |

No patient presented with Down syndrome; We presented the data using the number of individuals (N) and the percentage (%); SARI, severe acute respiratory infection; SARS-CoV-2, severe acute respiratory syndrome coronavirus 2; <sup>a</sup>, we performed the statistical analysis using the chi-square test; <sup>b</sup>, we performed the statistical analysis using the Fisher's exact test. We adopted an alpha error of 0.05. We demonstrated the significant *p* using the bold type.

**Supplementary Table S5.** Association between the need for intensive care unit and mechanical ventilatory support with risk of death in hospitalized patients with cystic fibrosis and SARS-CoV-2 infection in Brazil during the coronavirus disease, COVID-19 pandemic.

| Markers                        | Data         | Death due to SARI | Clinical Recovery | Total      | <i>p</i>                       |
|--------------------------------|--------------|-------------------|-------------------|------------|--------------------------------|
| Intensive care unit            | Yes          | 34 (66.7%)        | 17 (26.2%)        | 51 (44.0%) | <b>&lt; 0.001 <sup>a</sup></b> |
|                                | No           | 17 (33.3%)        | 48 (73.8%)        | 65 (56.0%) |                                |
| Mechanical ventilatory support | Invasive     | 27 (52.9%)        | 2 (3.1%)          | 29 (25.0%) | <b>&lt; 0.001 <sup>b</sup></b> |
|                                | Non-invasive | 21 (41.2%)        | 41 (63.1%)        | 62 (53.4%) |                                |
|                                | No           | 3 (5.9%)          | 22 (33.8%)        | 25 (21.6%) |                                |

We presented the data using the number of individuals (N) and the percentage (%); SARI, severe acute respiratory infection; SARS-CoV-2, severe acute respiratory syndrome coronavirus 2; <sup>a</sup>, we performed the statistical analysis using the chi-square test; <sup>b</sup>, we performed the statistical analysis using the Fisher's exact test. We adopted an alpha error of 0.05. We demonstrated the significant *p* using the bold type.
